# Supplementary material
Source: HighWire-hosted journal article supplement (https://www.jrheum.org/highwire/filestream/39069/field_highwire_adjunct_files/0/190373DataSuppl.pdf)
Supplement: 190373DataSuppl.pdf [file 190373DataSuppl.pdf]

**ONLINE SUPPLEMENTARY MATERIAL.**

**Supplementary Table 1.** Categories of comorbidities.

|                               |                                                                                                                                                                        |
|-------------------------------|------------------------------------------------------------------------------------------------------------------------------------------------------------------------|
| airway disease                |                                                                                                                                                                        |
| allergic disease              | bronchial asthma, allergic rhinitis                                                                                                                                    |
| upper airway disease          | chronic rhinitis, chronic otitis media, history of sinus surgery, severe caries necessitating extraction                                                               |
| lower airway disease          | bronchiectasis, pulmonary infections, emphysema, fibrotic interstitial lung disease (NSIP, UIP)                                                                        |
| infectious airway disease     | upper airway disease, bronchiectasis, pulmonary infections (history of pulmonary tuberculosis, pulmonary non-tuberculosis mycobacterium infections, fungal infections) |
| non-infectious airway disease | emphysema, fibrotic interstitial lung disease                                                                                                                          |
| heart disease                 | atrial fibrillation, heart valve disease, chronic heart failure                                                                                                        |
| atherosclerotic disease       | hypertension, diabetes, ischemic heart disease, stroke, arteriosclerosis obliterans/aneurysm                                                                           |
| others                        | history/presence of malignancy                                                                                                                                         |

**Supplementary Table 2.** Vasculitis involvements of AAV patients at diagnosis.

|                        | Total    | EGPA     | GPA      | MPA      | uAAV     | p value           |
|------------------------|----------|----------|----------|----------|----------|-------------------|
| cases                  | 195      | 24       | 51       | 89       | 31       | among AAV         |
| female(%)              | 58.0%    | 54.2%    | 62.8%    | 55.1%    | 61.3%    | >0.1              |
| age (y.o. mean±SD)     | 69±12    | 57±13    | 68±12    | 71±11    | 75±9     | <b>&lt;0.0001</b> |
| MPO-ANCA (%)           | 75.9%    | 41.7%    | 58.8%    | 91.0%    | 87.1%    | <b>&lt;0.0001</b> |
| PR3-ANCA (%)           | 17.4%    | 8.3%     | 39.2%    | 10.1%    | 9.7%     | <b>0.0001</b>     |
| BVAS (mean±SD)         | 15.4±7.9 | 17.9±8.5 | 16.5±9.8 | 15.9±6.4 | 10.1±5.7 | <b>0.0002</b>     |
| general                | 85.1%    | 75.0%    | 88.2%    | 85.4%    | 87.1%    | >0.1              |
| muscle joint symptom   | 54.9%    | 75.0%    | 51.0%    | 52.8%    | 51.6%    | >0.1              |
| skin                   | 25.6%    | 54.2%    | 17.7%    | 27.0%    | 12.9%    | <b>0.0032</b>     |
| ENT                    | 34.3%    | 41.7%    | 90.2%    | 7.9%     | 12.9%    | <b>&lt;0.0001</b> |
| heart                  | 3.6%     | 12.5%    | 3.9%     | 1.1%     | 3.2%     | >0.1              |
| lung                   | 39.0%    | 45.8%    | 62.8%    | 25.8%    | 32.3%    | <b>0.02</b>       |
| pulmonary hemorrhage   | 4.1%     | 0%       | 5.9%     | 4.5%     | 3.2%     | >0.1              |
| kidney                 | 59.5%    | 25.0%    | 43.1%    | 85.4%    | 38.7%    | <b>&lt;0.0001</b> |
| abdominal              | 2.0%     | 8.3%     | 2.0%     | 0%       | 0%       | 0.0605            |
| central nervous system | 7.2%     | 4.2%     | 15.7%    | 3.4%     | 6.5%     | 0.071             |
| pachymeningitis        | 2.6%     | 0%       | 9.8%     | 0%       | 0%       | <b>0.0032</b>     |
| sensory neuropathy     | 42.6%    | 91.7%    | 31.4%    | 39.3%    | 32.3%    | <b>&lt;0.0001</b> |
| motor neuropathy       | 14.9%    | 66.7%    | 7.8%     | 10.1%    | 0%       | <b>&lt;0.0001</b> |
| eGFR (ml/min, mean±SD) | 65±33    | 96±30    | 71±31    | 53±31    | 67±24    | <b>&lt;0.0001</b> |
| use of CY              | 34.7%    | 26.1%    | 33.3%    | 41.6%    | 23.3%    | >0.1              |
| use of RTX             | 11.9%    | 0%       | 21.6%    | 12.4%    | 3.3%     | <b>0.0059</b>     |

**Supplementary Table 3.** Vasculitis involvements of MPO-ANCA-positive AAV patients at diagnosis.

|                        | EGPA      | GPA      | MPA       | uAAV     | p value           |
|------------------------|-----------|----------|-----------|----------|-------------------|
| cases                  | 10        | 27       | 81        | 25       |                   |
| female                 | 50.0%     | 66.7%    | 55.6%     | 64.0%    | >0.1              |
| age (y.o. mean±SD)     | 62.0±14.0 | 70.0±8.9 | 71.7±10.8 | 76.0±8.1 | <b>0.0054</b>     |
| BVAS score (mean±SD)   | 18.9±5.5  | 17.9±8.5 | 16.3±6.4  | 10.3±5.9 | <b>0.0003</b>     |
| general                | 100%      | 88.9%    | 87.7%     | 88.0%    | >0.1              |
| muscle joint symptom   | 100%      | 40.7%    | 51.9%     | 52.0%    | <b>0.0024</b>     |
| skin                   | 60.0%     | 22.2%    | 25.9%     | 16.0%    | 0.080             |
| ENT                    | 50.0%     | 92.6%    | 7.4%      | 16.0%    | <b>&lt;0.0001</b> |
| heart                  | 10.0%     | 0%       | 1.2%      | 4.0%     | >0.1              |
| lung                   | 50.0%     | 59.3%    | 28.4%     | 32.0%    | <b>0.0279</b>     |
| pulmonary hemorrhage   | 0%        | 3.7%     | 4.9%      | 4.0%     | >0.1              |
| kidney                 | 30.0%     | 44.4%    | 87.7%     | 40.0%    | <b>&lt;0.0001</b> |
| abdominal              | 0%        | 0%       | 0%        | 0%       | >0.1              |
| central nervous system | 10.0%     | 14.8%    | 3.7%      | 8.0%     | >0.1              |
| pachymeningitis        | 0%        | 14.8%    | 0%        | 0%       | <b>0.0031</b>     |
| sensory neuropathy     | 90.0%     | 33.3%    | 38.3%     | 36.0%    | <b>0.0082</b>     |
| motor neuropathy       | 60.0%     | 3.7%     | 8.7%      | 0%       | <b>&lt;0.0001</b> |

ENT: ear, nasal and tracheal involvement; eGFR: estimated glomerular flow rate; Statistically significant values are shown in bold ( $p < 0.05$ ).
